# Supplementary material for: The impact of food insecurity on HIV outcomes in Senegal, West Africa: a prospective longitudinal study
Source: PubMed Central journal article supplement (PMC7936446; doi:10.1186/s12889-021-10444-1), 2021-03-06
Supplement: 12889_2021_10444_MOESM1_ESM.pdf [file 12889_2021_10444_MOESM1_ESM.pdf]

**The impact of food insecurity on HIV outcomes in Senegal, West Africa:  
A prospective longitudinal study**

English translation of study questionnaire

|                                                                                                              |
|--------------------------------------------------------------------------------------------------------------|
| <b>ENROLLMENT</b>                                                                                            |
| <b>PART 1</b>                                                                                                |
| <b>Participant age:</b>                                                                                      |
| <b>Participant sex:</b>                                                                                      |
| <b>Where were you born (country, region, department)?</b>                                                    |
| <b>Where do you live currently (country, region, department)?</b>                                            |
| <b>How long does it take for you to travel from home to the clinic?</b>                                      |
| <b>What means of transportation do you use to get to the clinic?</b>                                         |
| <b>What is the round trip cost of transportation to the clinic?</b>                                          |
| <b>What is your marital status:</b>                                                                          |
| <b>Have you shared your HIV status with anyone?</b>                                                          |
| If YES, with who?                                                                                            |
| If NO, why haven't you shared your status?                                                                   |
| <b>What is your highest educational level?</b> No school    Primary school    Secondary school    University |
| <b>Can you read and write?</b>                                                                               |
| <b>Do you know how to do arithmetic?</b>                                                                     |
| <b>Are you employed?</b>                                                                                     |
| If you were employed previously, why are you no longer employed?                                             |
| If you are no longer working because of HIV/AIDS, explain:                                                   |
| <b>What is your profession?</b>                                                                              |
| <b>How many children to you have?</b>                                                                        |
| Have your children been tested for HIV?    Yes    No    Don't know                                           |
| <b>Number of people in the household:</b>                                                                    |
| <b>Number of people in the household &lt;5 years of age:</b>                                                 |
| <b>Number of people in the household ≥18 years of age:</b>                                                   |
| <b>Number of people in household who are employed:</b>                                                       |
| <b>Do you receive financial support in the form of donations or transfers?</b>                               |
| If YES, from whom, the amount and the frequency:                                                             |
| <b>Do you provide financial support in the form of donations or transfers?</b>                               |
| If YES, to whom, the amount and the frequency:                                                               |
| <b>Do you have a personal cell phone?</b>                                                                    |
| If YES, is there any credit?                                                                                 |
| <b>Is there electricity in the household?</b>                                                                |
| <b>Is there tap water in the household?</b>                                                                  |
| <b>Type of household toilet:</b>                                                                             |
| <b>Type of household floor:</b>                                                                              |
| <b>Do you have or have you ever had livestock?</b>                                                           |
| If YES, specify type of animal and number of each:                                                           |
| If you previously had livestock, please explain why you no longer have livestock:                            |
| Do you eat your livestock or their products (eggs, milk, etc.)?                                              |
| Do you sell your livestock or their products (eggs, milk, etc.)?                                             |
| <b>Do you or have you ever practiced agriculture or gardening?</b>                                           |

|                                                                                                                           |
|---------------------------------------------------------------------------------------------------------------------------|
| If YES, what are you cultivating?                                                                                         |
| If you previously practiced agriculture or gardening, please explain why you no longer practice agriculture or gardening: |
| Do you eat the products you cultivate?                                                                                    |
| Do you sell the products you cultivate?                                                                                   |
| <b>Do you practice fishing?</b>                                                                                           |
| If YES, do you eat what you catch?                                                                                        |
| Do you sell what you catch?                                                                                               |
| <b>Who prepares the meals in your household?</b>                                                                          |
| <b>Who buys food for your household?</b>                                                                                  |
| <b>How much is spent per day on food in your household?</b>                                                               |
| <b>How many people contribute money for food for the household?</b>                                                       |
| <b>Have you ever begged for food?</b>                                                                                     |
| <b>Have you ever traded for food?</b>                                                                                     |
| <b>Have you ever received donated food?</b>                                                                               |
| <b>Have you ever received food aid?</b>                                                                                   |
| If YES, please describe the type of aid, when it was received, and from which organization:                               |

|                                                                                                |
|------------------------------------------------------------------------------------------------|
| <b>PART 2</b>                                                                                  |
| <b>Type of HIV:</b>                                                                            |
| <b>Date of HIV diagnosis:</b>                                                                  |
| <b>Reason for screening:</b>                                                                   |
| <b>WHO stage:</b> <b>Date:</b>                                                                 |
| <b>CD4 nadir:</b> <b>Date:</b>                                                                 |
| <b>Most recent CD4:</b> <b>Date:</b>                                                           |
| <b>Prior TB testing:</b> <b>Date:</b>                                                          |
| <b>Have you had a cough in the last 24hrs?</b>                                                 |
| <b>Have you had a fever in the last 24hrs?</b>                                                 |
| <b>Have you had diarrhea in the last 24hrs?</b>                                                |
| <b>Have you experienced any challenges getting tested for HIV?</b>                             |
| If YES, please explain:                                                                        |
| <b>Have you experienced any challenges getting treatment for HIV?</b>                          |
| If YES, please explain:                                                                        |
| <b>Anticipated ART start date:</b>                                                             |
| <b>Anticipated ART regimen:</b>                                                                |
| If ART dispensed today, number of doses dispensed:                                             |
| Number of tablets per day:            Morning:            Afternoon:            Evening:       |
| <b>Have you received ART previously?</b>                                                       |
| If YES, between which dates:                                                                   |
| If YES, why did you stop taking ART?                                                           |
| If YES, what ART did you receive previously?                                                   |
| <b>Are you currently taking co-trimoxazole:</b>                                                |
| If YES, when did you start taking co-trimoxazole?                                              |
| <b>List all other medications given to the patient and the date when they were prescribed:</b> |
| <b>Is the participant currently pregnant?</b>                                                  |
| If YES, provide the due date:                                                                  |
| <b>Is the participant currently breastfeeding?</b>                                             |
| <b>Does the participant have any other medical problems?</b>                                   |

|                                                                                                                     |
|---------------------------------------------------------------------------------------------------------------------|
| If YES, specify:                                                                                                    |
| <b>Is the participant taking any other drugs?</b>                                                                   |
| If YES, specify:                                                                                                    |
| <b>When was the last time you visited a doctor ?</b>                                                                |
| <b>What was the reason for your last visit to the doctor?</b>                                                       |
| <b>Have you visited a traditional practitioner?</b>                                                                 |
| If YES, what was the reason for your last visit to the traditional practitioner?<br>When was the last visit (date)? |

|                                                                                                                                                                                                                                                                                             |
|---------------------------------------------------------------------------------------------------------------------------------------------------------------------------------------------------------------------------------------------------------------------------------------------|
| <b>FOLLOW-UP:            MONTH 6            MONTH 12</b>                                                                                                                                                                                                                                    |
| <b>PART 1</b>                                                                                                                                                                                                                                                                               |
| <b>Are you taking ARVs ?</b> YES, ALWAYS            YES, BUT NOT ALWAYS            NO<br>If YES, since when?<br>If YES but not always, why?<br>If NO, why not ?                                                                                                                             |
| <b>Did you have any problems getting your ARVs ?</b><br>If YES, explain:                                                                                                                                                                                                                    |
| <b>What are the challenges to adherence to ART?</b>                                                                                                                                                                                                                                         |
| <b>Has your marital status changed since the last study visit ?</b><br>If YES, how ?                                                                                                                                                                                                        |
| <b>Have you shared your HIV status?</b><br>If YES, with whom?<br>If NO, why haven't you shared your status?                                                                                                                                                                                 |
| <b>Have you had any children since the last study visit ?</b><br>If YES, how many ?<br>Have your children been tested for HIV?            Yes            No            Don't know                                                                                                           |
| <b>Are you employed ?</b><br>If you were employed previously, why are you no longer employed?<br>If you are no longer working because of HIV/AIDS, explain:                                                                                                                                 |
| <b>Profession:</b><br><b>Salary per month :</b><br><b>Has your salary changed since the last visit ?</b><br>If YES, how?                                                                                                                                                                    |
| <b>Do you have a personal cell phone?</b><br>If YES, is there any credit?                                                                                                                                                                                                                   |
| <b>How long does it take for you to travel from home to the clinic?</b><br><b>What means of transportation do you use to travel to the clinic?</b><br><b>What is the cost of transportation to the clinic (round trip)?</b>                                                                 |
| <b>Have you moved since the last study visit ?</b><br>If YES:<br>Why did you move?<br>Where do you currently live?<br>Is there electricity in the new household?<br>Is there tap water in the new household?<br>Type of toilet in the new household:<br>Type of floor in the new household: |
| <b>Has the number of people in the household changed since the last visit ?</b><br>If YES:<br>Number of people in the household <5 years of age:<br>Number of people in the household ≥18 years of age:<br>Number of people in the household employed:                                      |
| <b>Do you receive financial support in the form of donations or transfers?</b><br>If YES, from whom, the amount and the frequency:                                                                                                                                                          |
| <b>Do you provide financial support in the form of donations or transfers?</b><br>If YES, to whom, the amount and the frequency:                                                                                                                                                            |

|                                                                                                                                                                                                                                                                                                                                                                                     |
|-------------------------------------------------------------------------------------------------------------------------------------------------------------------------------------------------------------------------------------------------------------------------------------------------------------------------------------------------------------------------------------|
| <p><b>Do you have or have you ever had livestock?</b><br/>         If YES, specify type of animal and number of each:<br/>         If you previously had livestock, please explain why you no longer have livestock:<br/>         Do you eat your livestock or their products (eggs, milk, etc.)?<br/>         Do you sell your livestock or their products (eggs, milk, etc.)?</p> |
| <p><b>Do you or have you ever practiced agriculture or gardening?</b><br/>         If YES, what are you cultivating?<br/>         If you previously practiced agriculture or gardening, please explain why you no longer practice agriculture or gardening:<br/>         Do you eat the products you cultivate?<br/>         Do you sell the products you cultivate?</p>            |
| <p><b>Do you practice fishing?</b><br/>         If YES, do you eat what you catch?<br/>         Do you sell what you catch?</p>                                                                                                                                                                                                                                                     |
| <b>Who prepares the meals in your household?</b>                                                                                                                                                                                                                                                                                                                                    |
| <b>Who buys food for your household?</b>                                                                                                                                                                                                                                                                                                                                            |
| <b>How much is spent per day on food in your household?</b>                                                                                                                                                                                                                                                                                                                         |
| <b>How many people contribute money for food for the household?</b>                                                                                                                                                                                                                                                                                                                 |
| <p><b>Since the last visit:</b><br/> <b>Have you begged for food?</b><br/> <b>Have you traded for food?</b><br/> <b>Have you received donated food?</b><br/> <b>Have you received food aid?</b><br/>         If YES, when? What kind of aid? From which organization:</p>                                                                                                           |

|                                                                                                 |                 |                     |                   |   |              |
|-------------------------------------------------------------------------------------------------|-----------------|---------------------|-------------------|---|--------------|
| <b>PART 2</b>                                                                                   |                 |                     |                   |   |              |
| <b>WHO stage:</b>                                                                               | 1               | 2                   | 3                 | 4 | <b>Date:</b> |
| <b>New stage 3 or 4 clinical events since the last visit?</b>                                   | Yes             | No                  | If YES, describe: |   |              |
| <b>Most recent CD4:</b>                                                                         | <b>Date</b>     |                     |                   |   |              |
| <b>Current ART regimen:</b>                                                                     |                 |                     |                   |   |              |
| <b>Are you taking ARVs ?</b>                                                                    | YES, ALWAYS     | YES, BUT NOT ALWAYS | NO                |   |              |
| If YES, since when?                                                                             |                 |                     |                   |   |              |
| If YES but not always, why?                                                                     |                 |                     |                   |   |              |
| If NO, why not?                                                                                 |                 |                     |                   |   |              |
| <b>How many ARV tablets per day in total?</b>                                                   | <b>Morning:</b> | <b>Afternoon:</b>   | <b>Evening:</b>   |   |              |
| <b>Are you taking Co-trimoxazole:</b>                                                           |                 |                     |                   |   |              |
| <b>In the past 7 days, how many days did you miss taking all of your ARV tablets ?</b>          |                 |                     |                   |   |              |
| <b>In the past 7 days, how many days did you miss taking <math>\geq 1</math> ARV tablets ?</b>  |                 |                     |                   |   |              |
| <b>In the past 4 weeks, how many days did you miss taking all of your ARV tablets ?</b>         |                 |                     |                   |   |              |
| <b>In the past 4 weeks, how many days did you miss taking <math>\geq 1</math> ARV tablets ?</b> |                 |                     |                   |   |              |
| <b>Have you had any problems getting your ARVs ?</b>                                            |                 |                     |                   |   |              |
| If YES, explain:                                                                                |                 |                     |                   |   |              |
| <b>What are the challenges to adherence to ART?</b>                                             |                 |                     |                   |   |              |
| <b>Have you had any interruptions in ART?</b>                                                   |                 |                     |                   |   |              |
| If YES, why?                                                                                    |                 |                     |                   |   |              |
| <b>Has your ART been interrupted due to stock-outs?</b>                                         |                 |                     |                   |   |              |
| <b>Have you missed taking medication due to lack of food ?</b>                                  |                 |                     |                   |   |              |
| <b>Have you had any side effects that kept you from eating ?</b>                                |                 |                     |                   |   |              |
| If YES, describe:                                                                               |                 |                     |                   |   |              |

|                                                                                                                                                                                                                                                                                                                                      |
|--------------------------------------------------------------------------------------------------------------------------------------------------------------------------------------------------------------------------------------------------------------------------------------------------------------------------------------|
| <b>Have you had a cough in the last 24 hours?</b>                                                                                                                                                                                                                                                                                    |
| <b>Have you had a fever in the last 24 hours?</b>                                                                                                                                                                                                                                                                                    |
| <b>Have you had diarrhea in the last 24 hours?</b>                                                                                                                                                                                                                                                                                   |
| <b>List all other medications given to the patient and the date when they were prescribed:</b>                                                                                                                                                                                                                                       |
| <b>Is the participant currently pregnant?</b><br>If YES, how many months along in pregnancy:                                                                                                                                                                                                                                         |
| <b>Is the participant currently breastfeeding?</b>                                                                                                                                                                                                                                                                                   |
| <b>Do you have any other medical problems?</b><br>If YES, explain:                                                                                                                                                                                                                                                                   |
| <b>Are you taking any other medications OR traditional treatments ?</b><br>If YES, explain:                                                                                                                                                                                                                                          |
| <b>When was the last time you visited a doctor ?      Date :</b>                                                                                                                                                                                                                                                                     |
| <b>What was the reason for your last visit to the doctor?</b>                                                                                                                                                                                                                                                                        |
| <b>Have you visited a traditional practitioner?</b><br>If YES, what was the reason for your last visit to the traditional practitioner?<br>When was the last visit (date)?                                                                                                                                                           |
| <b>PRESCRIPTIONS</b>                                                                                                                                                                                                                                                                                                                 |
| <b>Has the participant's ART regimen been changed since the last visit?</b><br>If YES:<br>How many times?<br>Why?                                                                                                                                                                                                                    |
| <b>List medications prescribed today:</b>                                                                                                                                                                                                                                                                                            |
| <b>Will ART be dispensed today?</b><br>If NO:<br>Why not ?<br>When will ART be dispensed ?<br><br><b>If ART will be dispensed today:</b><br>How many days of ART dispensed today?<br>Before today, the date of the last ART refill:<br>Number of days since ART last filled:<br>How many days of ART were provided when last filled? |
